# Supplementary material
Source: PubMed Central journal article supplement (PMC2690611)

# Supplemental figure 1

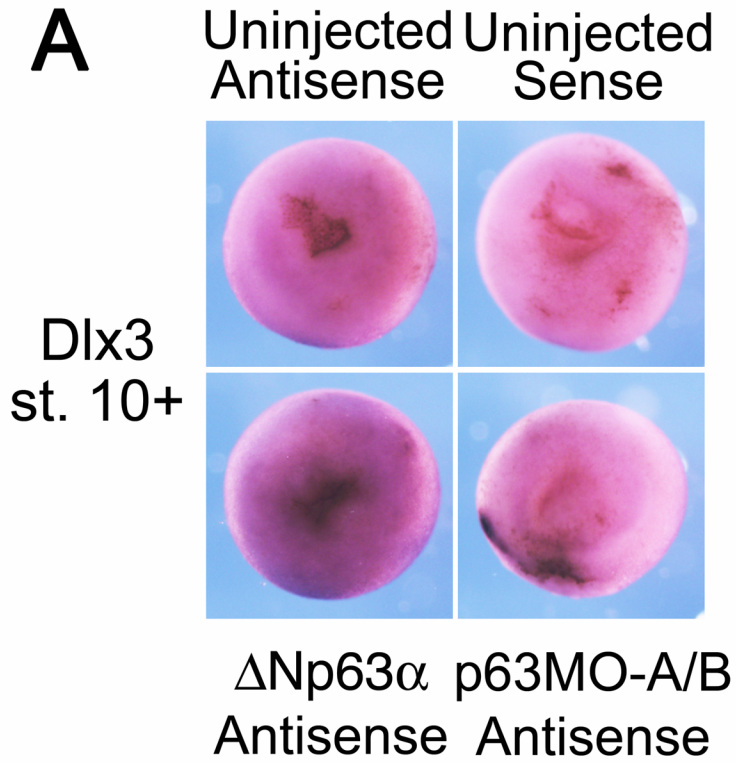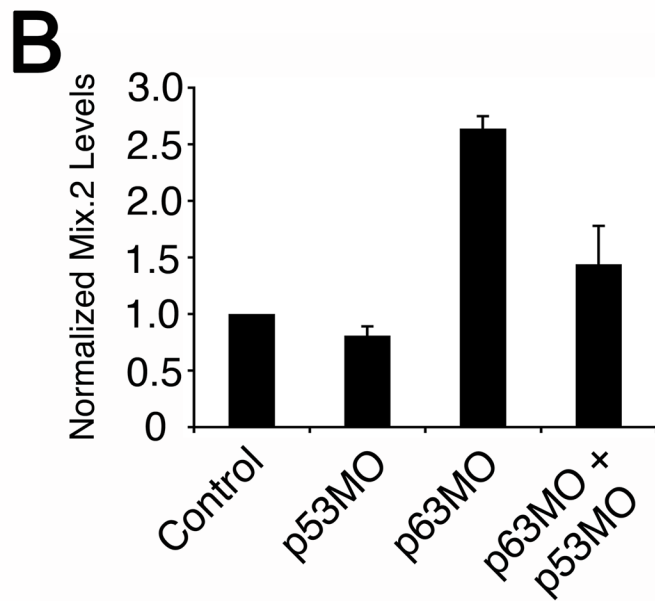

Supplement: NIHMS114330-supplement-01.pdf [file NIHMS114330-supplement-01.pdf]

## Supplemental figure 2

Stage 10.25

$\Delta$ Np63

p53

Vegetal  
pole

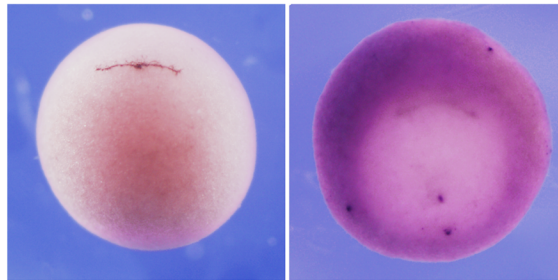

Animal  
pole

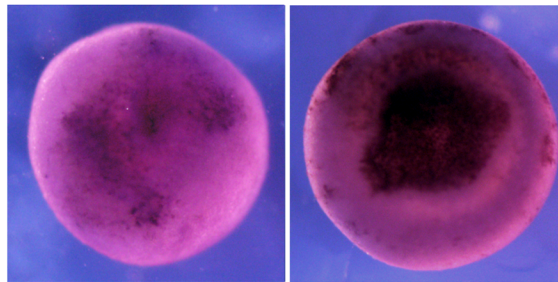

Supplement: NIHMS114330-supplement-02.pdf [file NIHMS114330-supplement-02.pdf]

# Supplemental figure 3

Control

$\Delta$ Np63 $\alpha$   
R304W

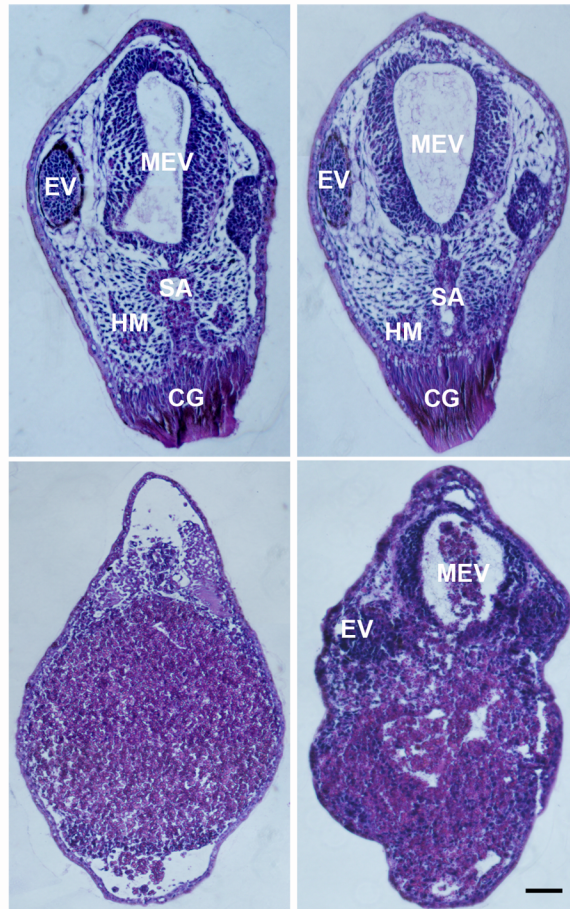

$\Delta$ Np63 $\alpha$

p63MO-A/B

Supplement: NIHMS114330-supplement-03.pdf [file NIHMS114330-supplement-03.pdf]
